# Supplementary material
Source: PubMed Central journal article supplement (PMC1904159)

## miR-191 probe (208 nt)

5' : 35 nt

T7GGGCGAATTCGAGCTCGGTACCCcuggacagcggg **ca** **acggaaucc** **aa** **gcagcug** uu - c  
 guagaccggucccgcgacgaguccgucucguc**cc** **ugcuuuagg** **uu** **cgucgac** ua ga a  
 g **cc** - **cg** cu c g  
 gtgccctgacccccagacatactttactgagctg  
 hairpin: 64 nt  
 (mature 191/191\*: 22 nt)

GGGGacucccgcuugacucuccuugacucugggu  
 BamHI 3' : 109 nt

|                 | RPA    | In vitro cleavage with Drosha<br>as uncleaved 208 nt |
|-----------------|--------|------------------------------------------------------|
| pri-miR         | 182 nt | 64 nt                                                |
| hairpin         | 64 nt  | 64 nt                                                |
| upstream (5')   | 12 nt  | 35 nt                                                |
| downstream (3') | 106 nt | 109 nt                                               |

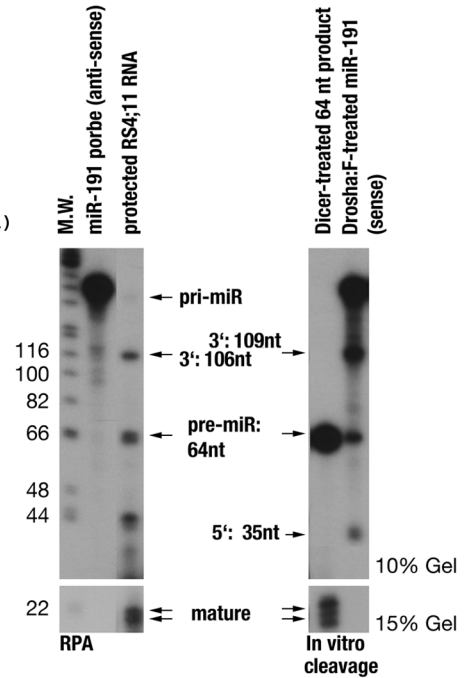

## miR-155 probe (with T7: 174 nt)

5' : 58 nt

T7GGGCGAATTCcAugccucauccucugagugcugaaggcuugcuguaggcuguaugcug **uuaa** **ugcuaau** **gug** **uagggg**uu uug c  
 Sp6GAGTATTCTTCGAACgagggugccgucguuaaacaagguacacuuacgaucauuguccguaguauguga **ca** **uu** **acg** **auu** **uac** **auc** **cuc** **ag** **aac** **u**  
 HindIII 3' : 54 nt

hairpin: 61 nt  
 (mature: 22 nt)

|                 | RPA    | In vitro cleavage with Drosha<br>as uncleaved 174 nt |
|-----------------|--------|------------------------------------------------------|
| pri-miR         | 161 nt | 61 nt                                                |
| hairpin         | 61 nt  | 61 nt                                                |
| upstream (5')   | 47 nt  | 58 nt                                                |
| downstream (3') | 53 nt  | 55 nt                                                |

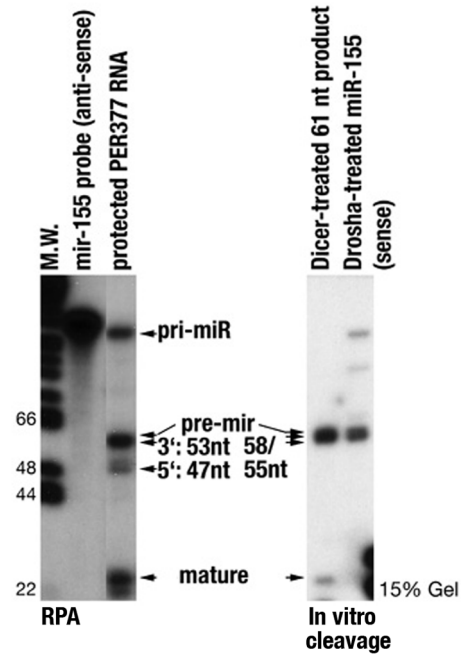

Supplement: pnas_0704559104_2.pdf [file pnas_0704559104_2.pdf]
