# Supplementary material
Source: PubMed Central journal article supplement (PMC1904159)
Supplement: pnas_0704559104_3.pdf [file pnas_0704559104_3.pdf]

## miR-23a probe (108 nt)

GAATTCctgatcaa  
aggaagcatctggggacctggaggggaggtgtccccaatctca  
ttacctcctttgctctctctctcttttctccctccaggtgccag  
cctctggccccgcccggtgccccctcaccctgtgccacggcc↓**NaeI**

```
          -      g      g      cuuc
          ggcuggg uuccugg gaug gauuug      c
          ||||  |||||  |||  |||||
GAGTATTCTTCGAACgucguaggagccaccgucucgagucccagccaaccuu agggacc uuac cuaaac      u
          u          g      a          acug
```

## Sp6

## miR-27a probe ( 122 nt)

GAATTCcagagaggccccgaagcctgtgcctggcc↓**Bsu36I**

```
          a a a          ug u          g u cac
          ug gg gc gggcuuagc cu gugagca gg c a
          || || || |||||  ||  |||||  || |
GAGTATTCTTCGAACguccgccguuccggucuccuccacucccgacccccgac cc cg cuugaaucg ga cacuugu cu g c
          c c c          gu -          g - aac
```

## Sp6
