# Supplementary material
Source: PubMed Central journal article supplement (PMC1904159)

REH

MV4;11

RS4;11

SEMK2

380

697

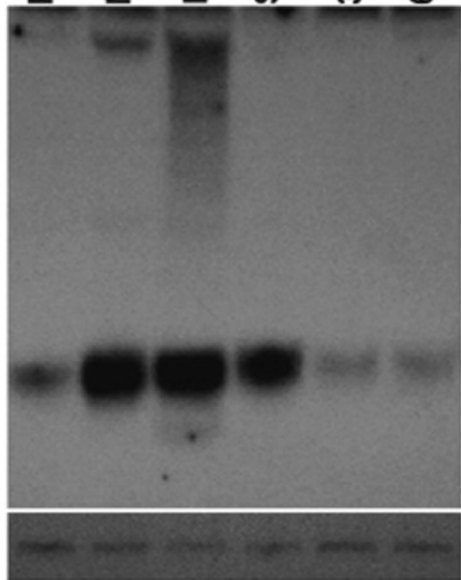

mir191

U6snRNA

Northern blot

Supplement: pnas_0704559104_1.pdf [file pnas_0704559104_1.pdf]
